# Supplementary material for: Life-years lost by COVID-19 patients in public hospitals of Marseille (APHM-South-Eastern France): a limited death toll: a retrospective analysis
Source: PubMed Central journal article supplement — BMJ Open. 2021 Dec 30;11(12):e049475. doi: 10.1136/bmjopen-2021-049475 (PMC8718937; doi:10.1136/bmjopen-2021-049475), 2021-12-30
Supplement: bmjopen-2021-049475supp001.pdf [file bmjopen-2021-049475supp001.pdf]

Supplementary Table 1\_ Clinical profile of deceased patients under 71 years of age.

| Age group                                                                              | % probability of dying within on years ( Charlson) | Clinical description                                                                                                                                          | No. of comorbidities | Life style                    |
|----------------------------------------------------------------------------------------|----------------------------------------------------|---------------------------------------------------------------------------------------------------------------------------------------------------------------|----------------------|-------------------------------|
| ≤ 41 Years (1 patient)                                                                 | 12 (100%)                                          | History of severe immune reaction to a viral infection                                                                                                        | 0                    | self-sufficient               |
| 41 - 50 Years (1 patient)                                                              | 52 (100%)                                          | Severe autism (syndrome of USHER), Deaf, Dumb, Blind                                                                                                          | 4                    | bedridden / Institutionalized |
| 51 - 60 Years (10 patients)                                                            | 26 %<br>1 patient                                  | None                                                                                                                                                          | 0                    |                               |
|                                                                                        | 52 %<br>4 patients                                 | Dementia + Bundle branch block                                                                                                                                | 2                    | Institutionalized             |
|                                                                                        |                                                    | High blood pressure + Asthma                                                                                                                                  | 2                    | self-sufficient               |
|                                                                                        |                                                    | Chronic pulmonary disease+ High blood pressure+ Sleep apnea + Hypothyroidism                                                                                  | 4                    | self-sufficient               |
|                                                                                        |                                                    | Diabetes + High blood pressure + Congestive heart failure                                                                                                     | 3                    | self-sufficient               |
|                                                                                        | 85 %<br>5 patients                                 | Metastatic solid tumor                                                                                                                                        | 1                    | Loss of independence          |
|                                                                                        |                                                    | Congestive heart failure + Renal disease + Diabetes + Dyslipidemia + Abdominal aortic aneurysm + Rheumatoid polyarthritis                                     | 6                    | bedridden                     |
|                                                                                        |                                                    | Cerebrovascular disease + Chronic pulmonary disease (with home oxygen therapy) + Diabetes + High blood pressure + Asthma + Dyslipidemia + Sickle cell disease | 7                    | Self-sufficient               |
| Metastatic solid tumor + Cerebrovascular disease with Hemiplegia + High blood pressure |                                                    | 4                                                                                                                                                             | Loss of independence |                               |
|                                                                                        | Metastatic solid tumor + Ulcer                     | 2                                                                                                                                                             | Loss of independence |                               |

|                              |                     |                                                                                                                                                 |   |                               |
|------------------------------|---------------------|-------------------------------------------------------------------------------------------------------------------------------------------------|---|-------------------------------|
| 61-70 Years<br>(22 patients) | 52 %<br>8 patients  | Diabetes + High blood pressure + Obesity                                                                                                        | 3 | Self-sufficient               |
|                              |                     | Diabetes + High blood pressure + Obesity + Anxiety disorders + Rhythm disorder                                                                  | 5 | Self-sufficient               |
|                              |                     | Diabetes with chronic complications + Obesity                                                                                                   | 2 | Self-sufficient               |
|                              |                     | Diabetes + Sleep apnea + Obesity+ Mesenteric ischemia                                                                                           | 3 | Self-sufficient               |
|                              |                     | High blood pressure + Obesity + Atrial fibrillation                                                                                             | 3 | Self-sufficient               |
|                              |                     | High blood pressure                                                                                                                             | 1 | Self-sufficient               |
|                              |                     | None                                                                                                                                            | 0 | Self-sufficient               |
|                              |                     | Schizophrenia + Morbid obesity + Hypothyroidism                                                                                                 | 3 | Institutionalized             |
|                              | 85 %<br>14 patients | Dementia +Chronic pulmonary disease+ Anxio-depressive disorders                                                                                 | 3 | Institutionalized             |
|                              |                     | Chronic pulmonary disease + Obesity + Diabetes + High blood pressure+ Asthma                                                                    | 5 | Self-sufficient               |
|                              |                     | Malignancy (malignancy, including leukemia and lymphoma) + Chronic pulmonary disease + Sleep apnea + Rheumatoid polyarthritis                   | 4 | Self-sufficient               |
|                              |                     | Congestive heart failure+ Obesity + Pulmonary hypertension+ Diabetes + High blood pressure + Dyslipidemia                                       | 7 | Self-sufficient               |
|                              |                     | Chronic pulmonary disease + Asthma + Diabetes + High blood pressure                                                                             | 4 | Loss of independence          |
|                              |                     | End stage renal disease + High blood pressure + Congestive heart failure                                                                        | 3 | Self-sufficient               |
|                              |                     | Malignancy (malignancy, including leukemia and lymphoma) + Dysphagia or Oro-esophageal ulcerations                                              | 2 | Self-sufficient               |
|                              |                     | Metastatic solid tumor+ Heart arrhythmia                                                                                                        | 2 | Loss of independence          |
|                              |                     | Severe epilepsy + Hepatitis B + Mental retardation                                                                                              | 3 | Institutionalized             |
|                              |                     | Metastatic solid tumor                                                                                                                          | 1 | Loss of independence          |
|                              |                     | Dementia + Congestive heart failure + High blood pressure +Amyloid angiopathy + Normal pressure hydrocephalus                                   | 5 | bedridden / Institutionalized |
|                              |                     | Dementia + Morbid obesity + High blood pressure + Hypothyroidism + Chronic pulmonary disease + Venous insufficiency                             | 7 | bedridden / Institutionalized |
|                              |                     | Dementia (Korsakoff) + Cerebrovascular disease with hemiplegia + Renal disease + Congestive heart failure+ High blood pressure + Undernutrition | 6 | bedridden / Institutionalized |

---

|  |                                                                          |   |                 |
|--|--------------------------------------------------------------------------|---|-----------------|
|  | Congestive heart failure + dyslipidemia + Diabetes + High blood pressure | 4 | Self-sufficient |
|--|--------------------------------------------------------------------------|---|-----------------|

---
